# Supplementary material for: 伝統的技法「金銷」の表面における色彩と光反射特性におよぼす地金の表面粗さおよび金銷温度の影響
Source: Royal Society of Chemistry journal article supplement (doi:10.1039/d1ay00346a), 1997-01-01
Supplement: d1ay00346a1.pdf [file d1ay00346a1.pdf]

## SUPPORTING INFORMATION

### ***In situ* and Real Time Investigation of Foliarly Applied Silver Nanoparticles in Spinach Leaves by Surface Enhanced Raman Spectroscopic Mapping Technique**

Zhiyun Zhang<sup>1</sup>, Heping Shang<sup>2</sup>, Baoshan Xing<sup>2</sup>, and Lili He<sup>1</sup>

<sup>1</sup>Department of Food Science, University of Massachusetts, Amherst, Massachusetts 01003, United States

<sup>2</sup>Stockbridge School of Agriculture, University of Massachusetts, Amherst, Massachusetts 01003, United States

\* **Corresponding Author:** Lili He,

**Mailing Address:** 240 Chenoweth Laboratory, 102 Holdsworth Way, Amherst, MA 01003,

**E-mail:** [lilihe@foodsci.umass.edu](mailto:lilihe@foodsci.umass.edu),

**Telephone:** +1 (413) 545-5847

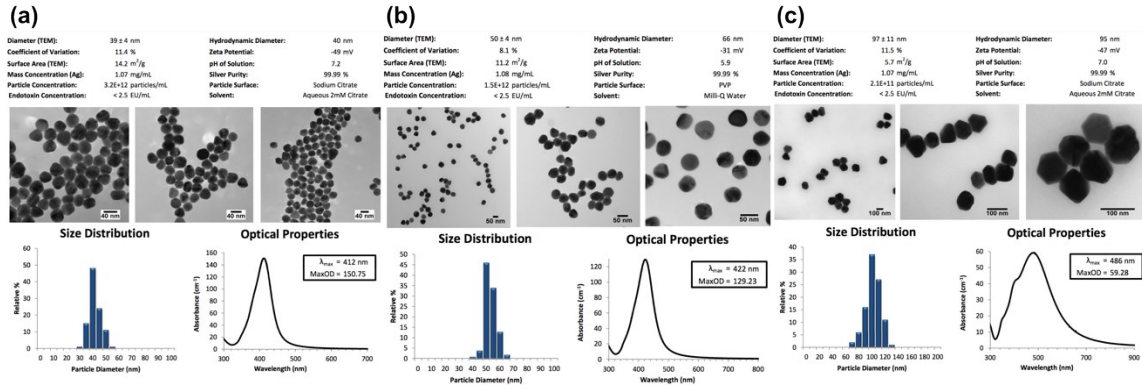

**Figure S1. The basic information of used AgNPs from nanocomposix.**

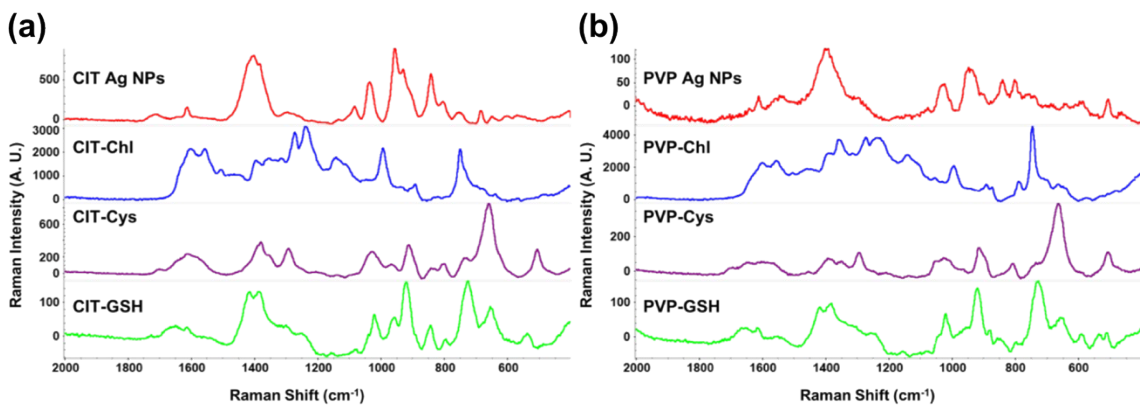

**Figure S2. In vitro SERS spectra of chlorophyll, cysteine, and glutathione.**

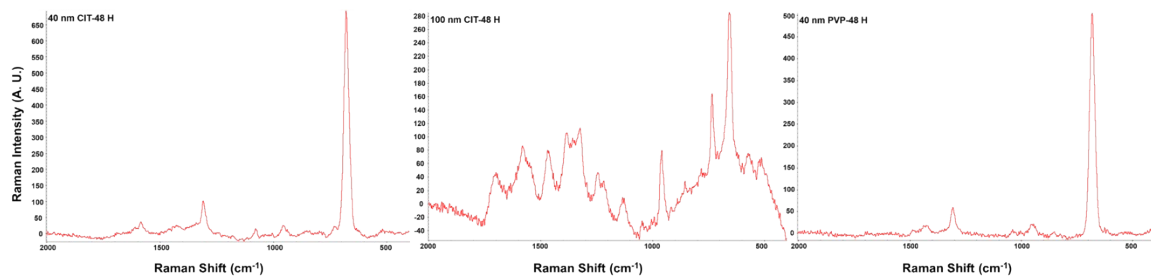

**Figure S3. *In situ* SERS spectra (Depth: 0  $\mu\text{m}$ ) of 40 nm CIT-AgNPs (a), 100 nm CIT-AgNPs (b), 40 nm PVP-AgNPs (c) in spinach after 48 h.**

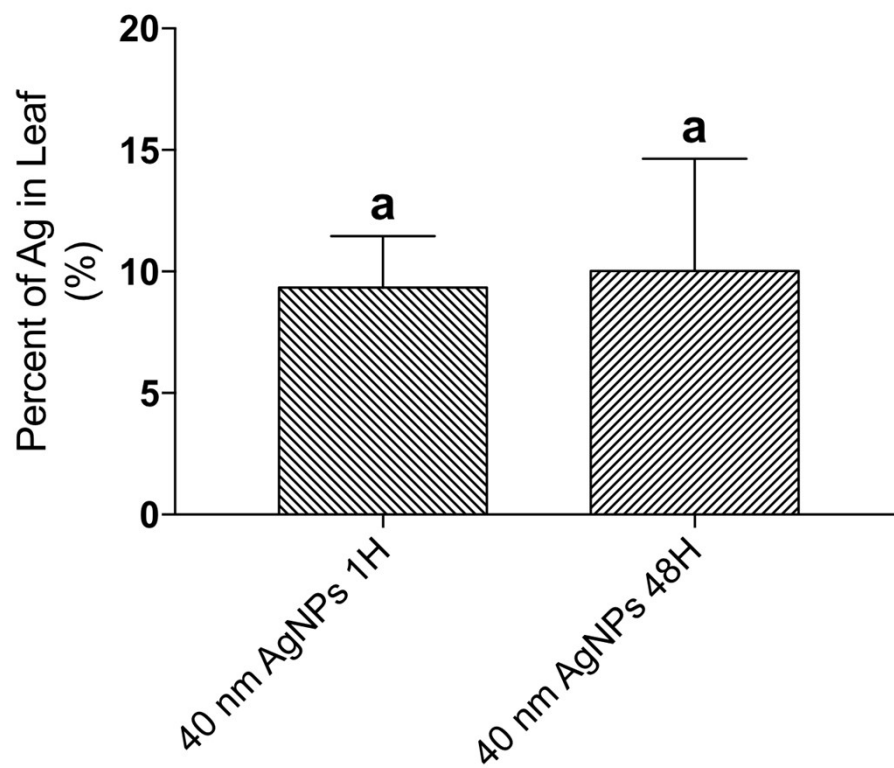

**Figure S4.** The amounts of penetrated Ag in spinach leaves by ICP-MS. Same letter represents a non-statistically significant difference ( $P>0.05$ ).

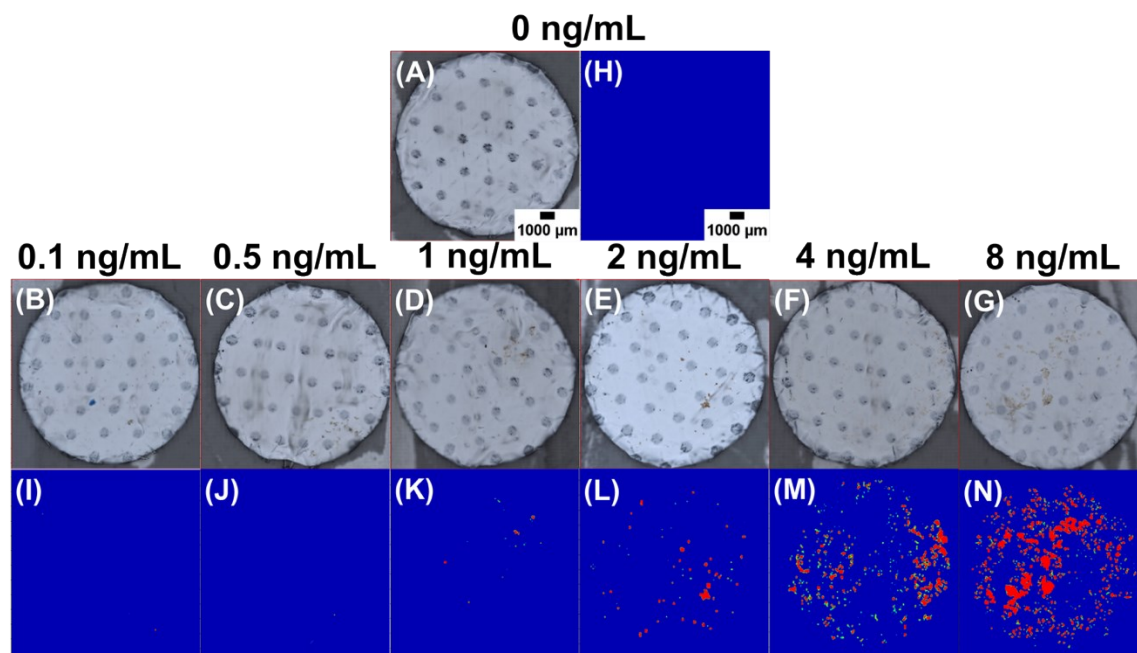

**Fig. S5** Different amount of 60 nm CIT-AgNPs on the filter membrane. Optical images: (A)-(C), (G)-(I); Raman scattering images: (D)-(F), (J)-(L). Laser wavelength=780 nm, Laser intensity=5 mW, aperture= 50 slit, step size= 100  $\mu\text{m}$ , scan rate=0.05 s/step.<sup>14</sup>
